# Supplementary material for: Effective construction of a B and N co-doped 3D porous carbon metal-free oxygen reduction reaction catalyst by a secondary pyrolysis strategy
Source: Royal Society of Chemistry journal article supplement (doi:10.1039/d3cy00498h), 2023-01-01
Supplement: d3cy00498h1.pdf [file d3cy00498h1.pdf]

## Supporting Information

### Effective construction of B, N co-doped 3D porous carbon metal-free oxygen reduction reaction catalyst by secondary pyrolysis strategy

Guang-Lan Li,<sup>a\*</sup> Xin Wang,<sup>a</sup> Fei Deng,<sup>a</sup> Zhong-Fa Lu,<sup>a</sup> Ce Hao,<sup>a</sup> Suli Wang,<sup>b\*</sup>

Gongquan Sun<sup>b</sup>

<sup>a</sup> State Key Laboratory of Fine Chemicals, Dalian University of Technology, Dalian 116023, PR China.

School of Chemical Engineering, Dalian University of Technology, Panjin 124221, PR China.

<sup>b</sup> Division of Fuel Cells and Battery, Dalian National Laboratory for Clean Energy, Dalian Institute of Chemical Physics, Chinese Academy of Sciences, Dalian 116023, China; Key Laboratory of Fuel Cells & Hybrid Power Sources, Chinese Academy of Sciences, Dalian 116023, China.

\*Corresponding authors. E-mail addresses: [guanglanli@dlut.edu.cn](mailto:guanglanli@dlut.edu.cn) (G.-L. Li), [suliwang@dicp.ac.cn](mailto:suliwang@dicp.ac.cn) (S. Wang)

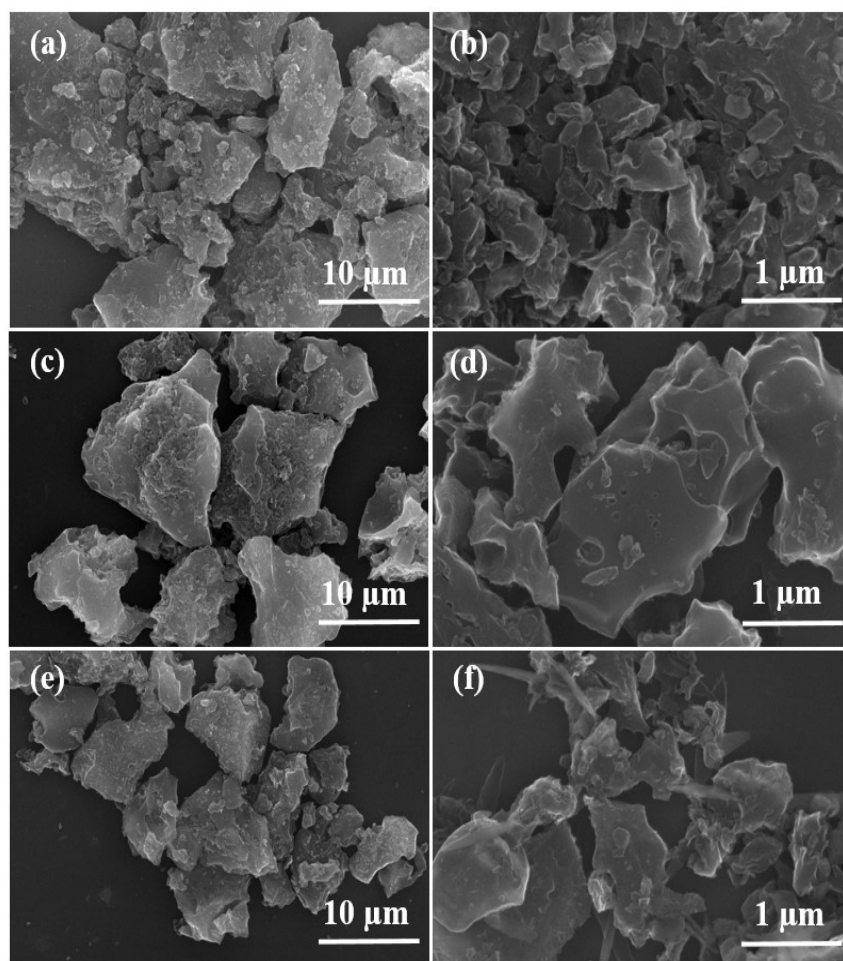

**Figure S1.** SEM images of (a-b) BNC-pre, (c-d) BNC-one, and (e-f) NC catalysts.

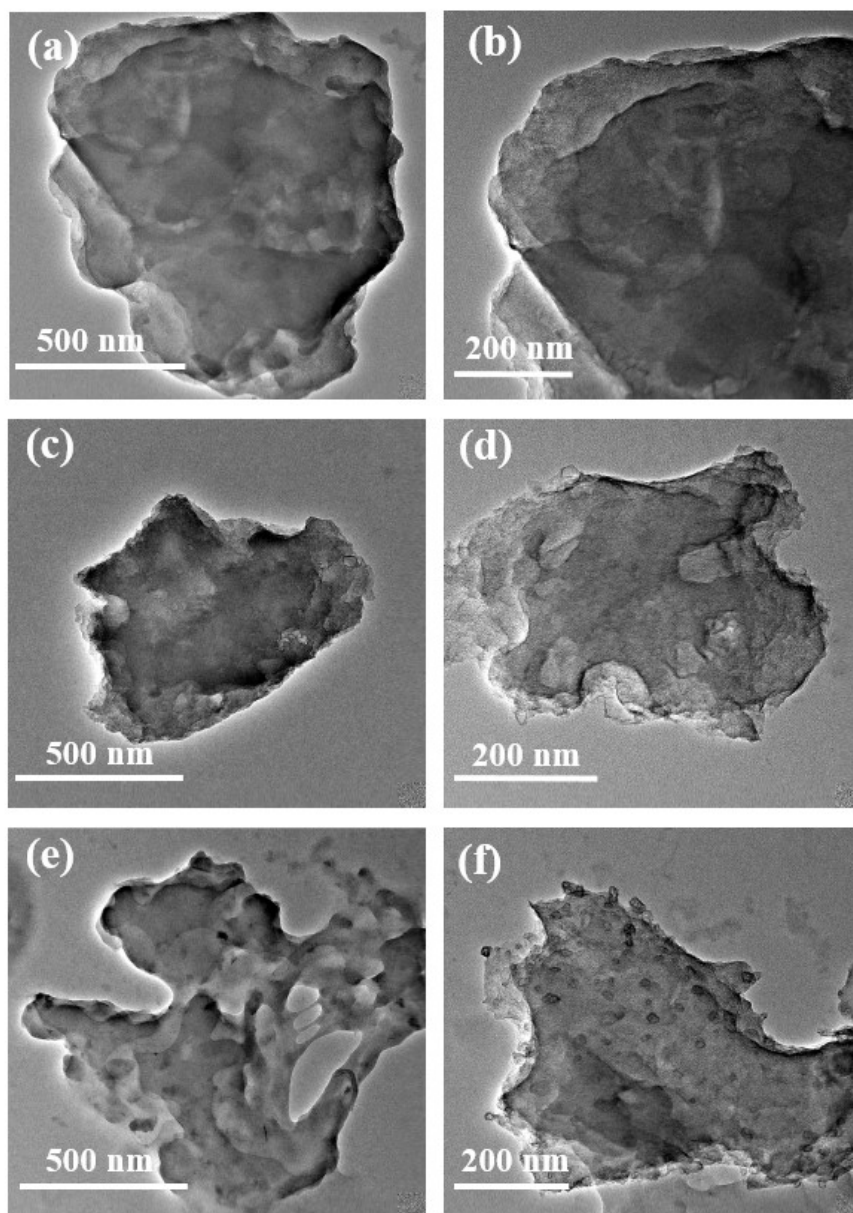

**Figure S2.** TEM images of (a-b) BNC-pre, (c-d) BNC-one, and (e-f) NC catalysts.

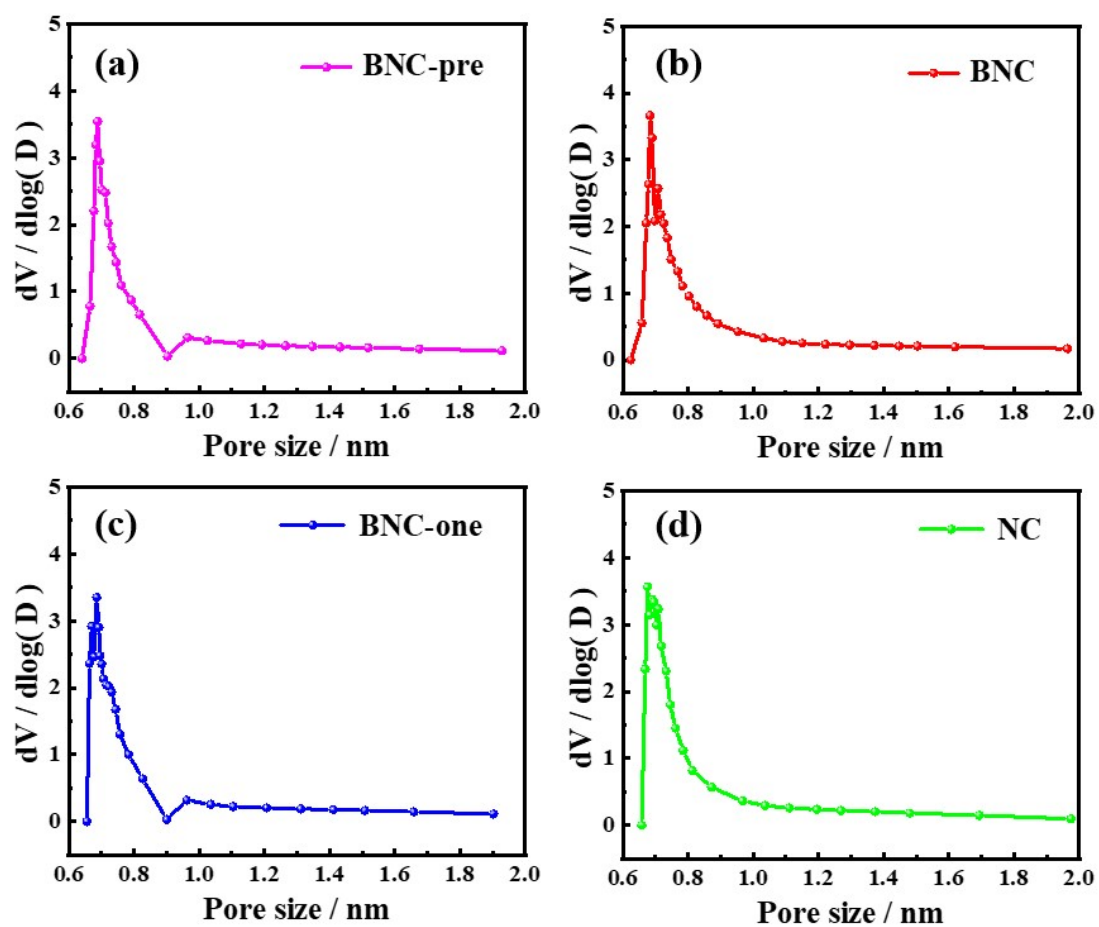

**Figure S3.** Micropore distribution curves of BNC-pre, BNC, BNC-one, and NC catalysts.

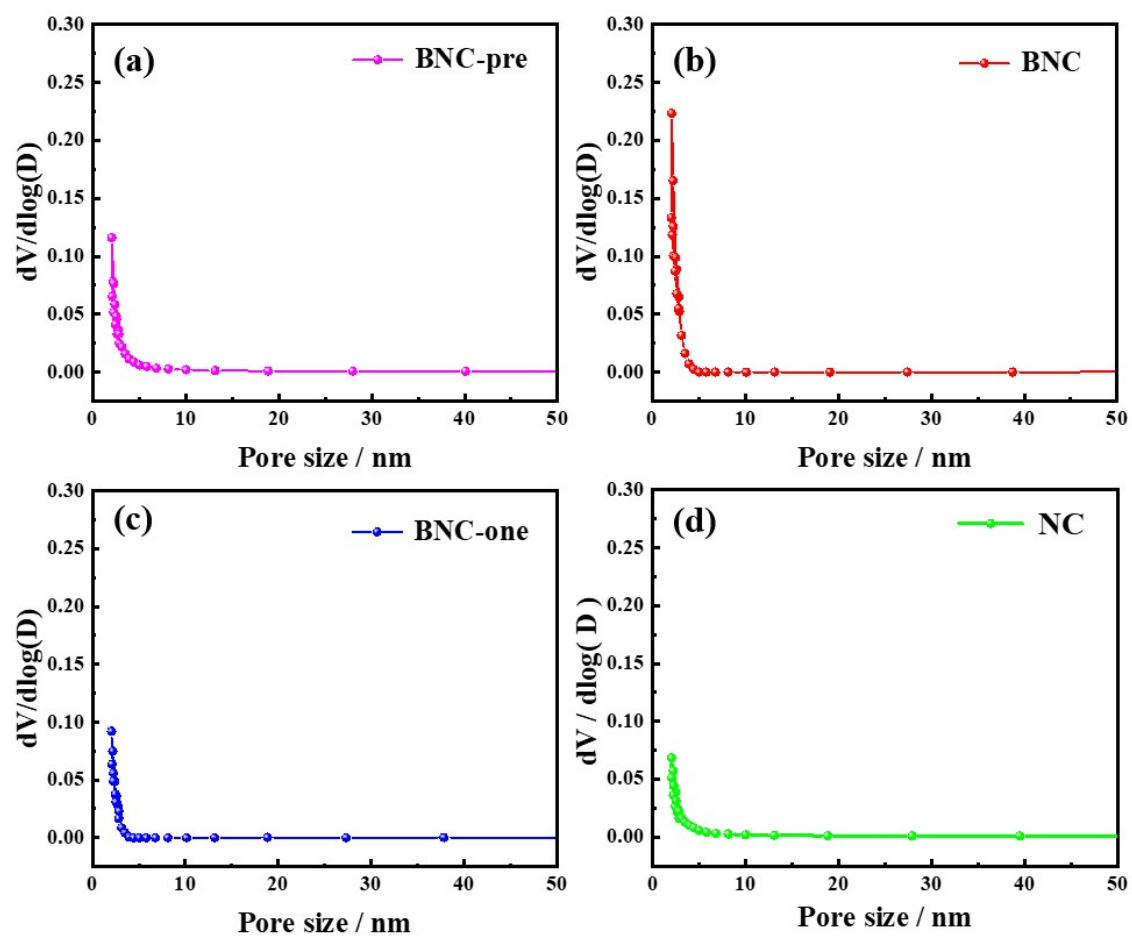

**Figure S4.** Mesoporous distribution curves of BNC-pre, BNC, BNC-one, and NC catalysts.

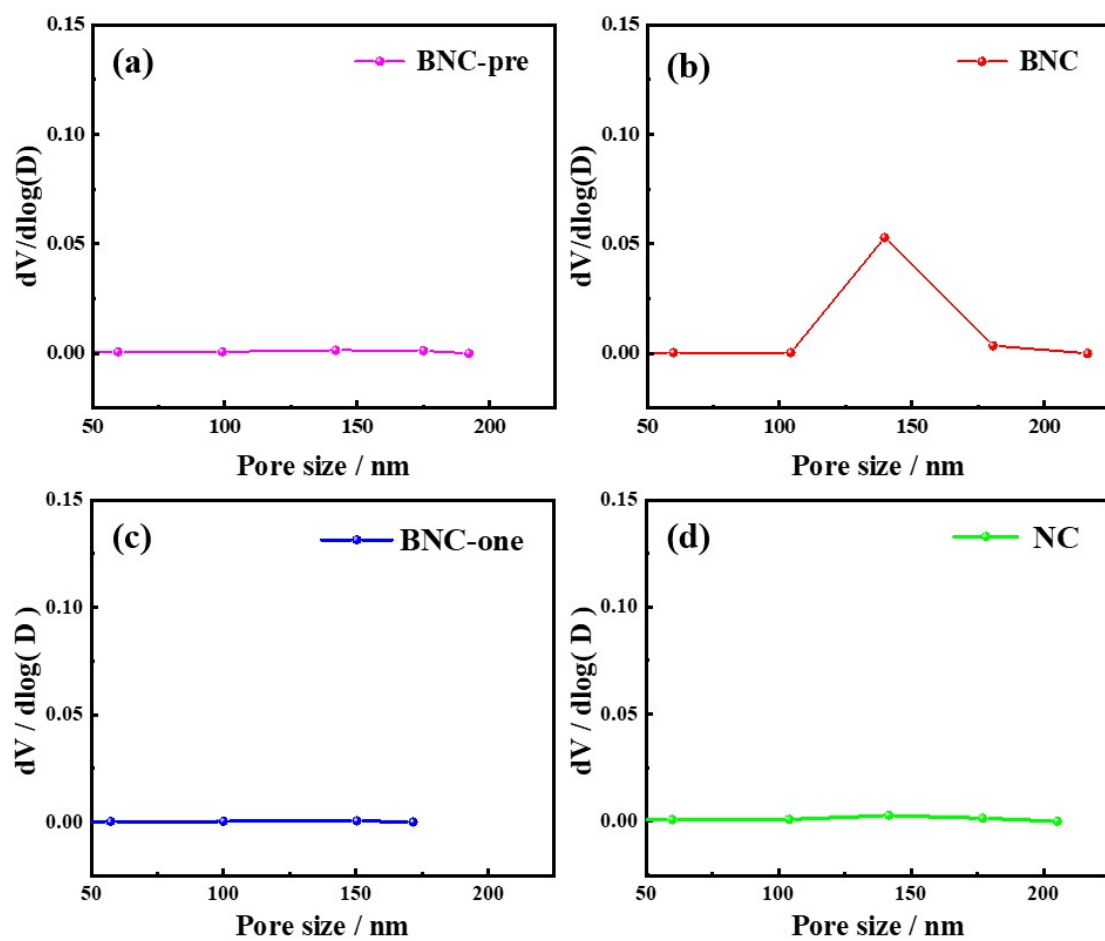

**Figure S5.** Macropore distribution curves of BNC-pre, BNC, BNC-one, and NC catalysts.

**Table S1.** The parameters of porous structures based on BET data for the prepared samples.

| Samples | Specific surface area ( $\text{m}^2 \text{g}^{-1}$ ) | Total pore volume ( $\text{cm}^3 \text{g}^{-1}$ ) |
|---------|------------------------------------------------------|---------------------------------------------------|
| BNC-pre | 1228.5                                               | 0.776                                             |
| BNC     | 1539.7                                               | 1.56                                              |
| BNC-one | 1299.9                                               | 0.656                                             |
| NC      | 1405.9                                               | 0.889                                             |

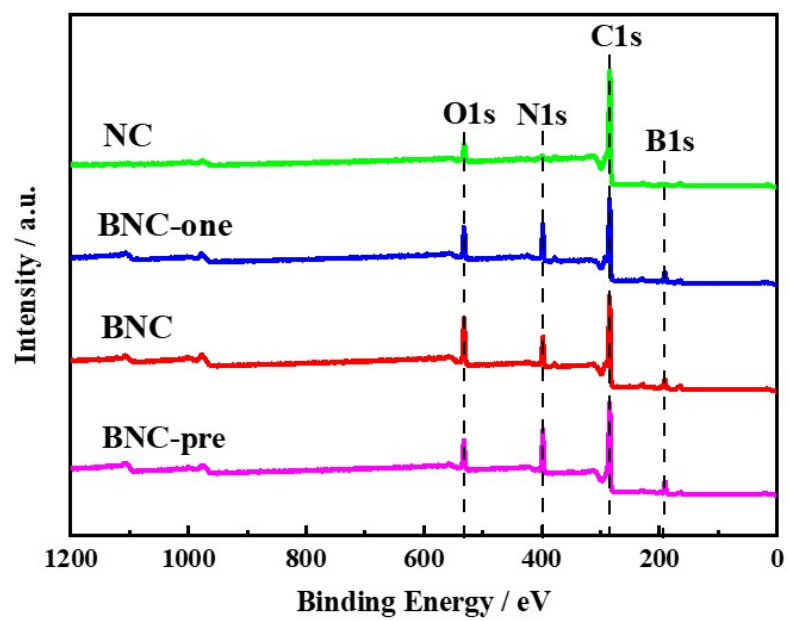

**Figure S6.** XPS spectra of BNC-pre, BNC, BNC-one, and NC catalysts.

**Table S2.** The element contents (at. %) of C, N, B, and O of BNC-pre, BNC, BNC-one, and NC catalysts based on the XPS.

| Element   | BNC-pre | BNC   | BNC-one | NC    |
|-----------|---------|-------|---------|-------|
| C (at. %) | 59.82   | 59.79 | 60.87   | 90.77 |
| N (at. %) | 15.27   | 11.30 | 14.23   | 3.30  |
| B (at. %) | 17.07   | 15.92 | 15.00   | /     |
| O (at. %) | 7.83    | 12.99 | 9.90    | 5.93  |

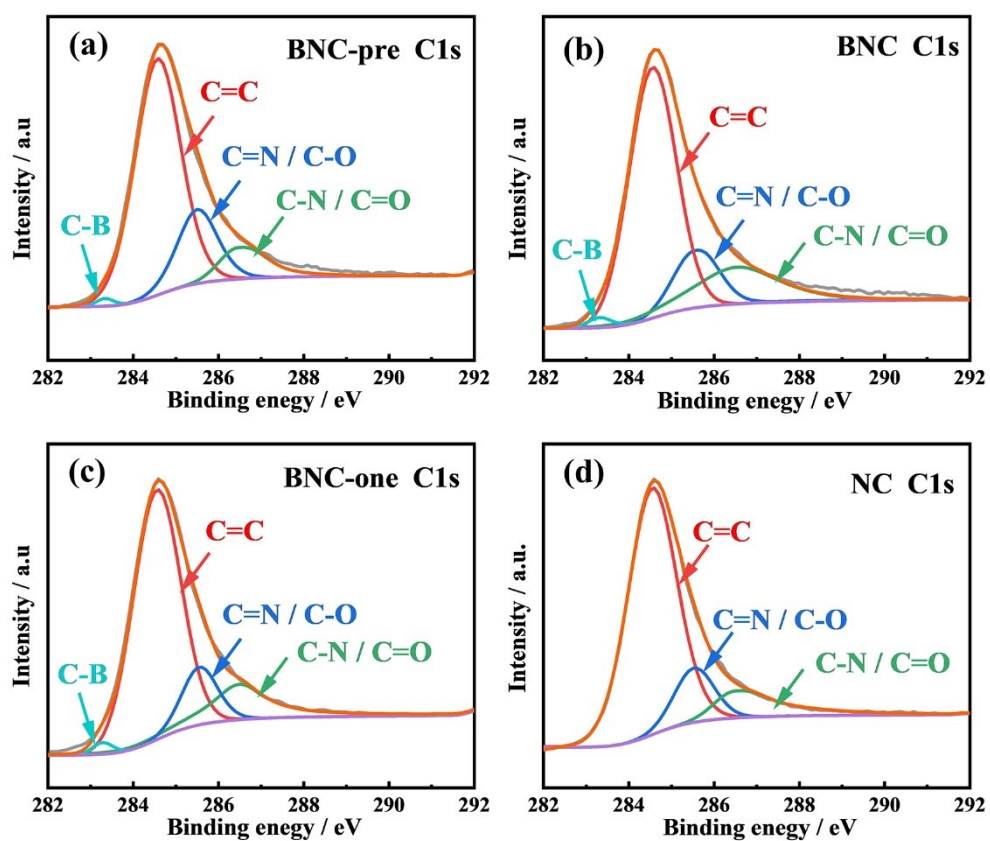

**Figure S7.** C 1s XPS spectra of (a) BNC-pre, (b) BNC, (c) BNC-one, and (d) NC catalysts.

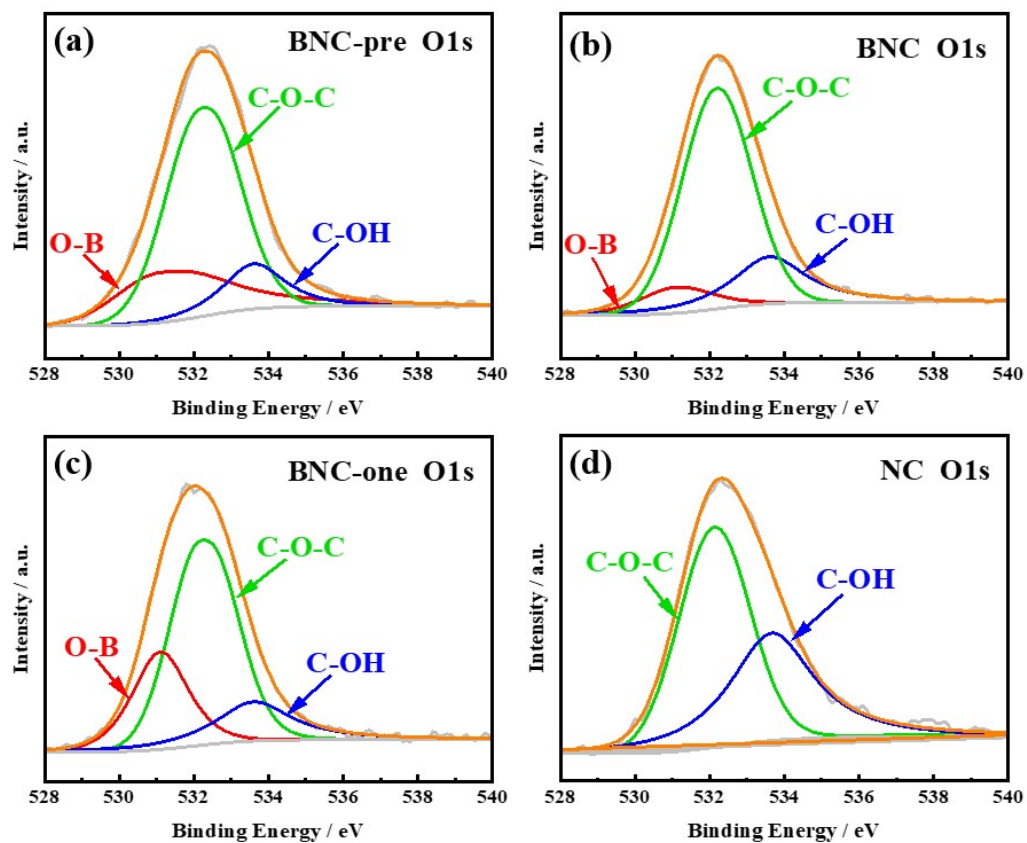

**Figure S8.** O 1s spectra of BNC-pre, BNC, BNC-one, and NC catalysts.

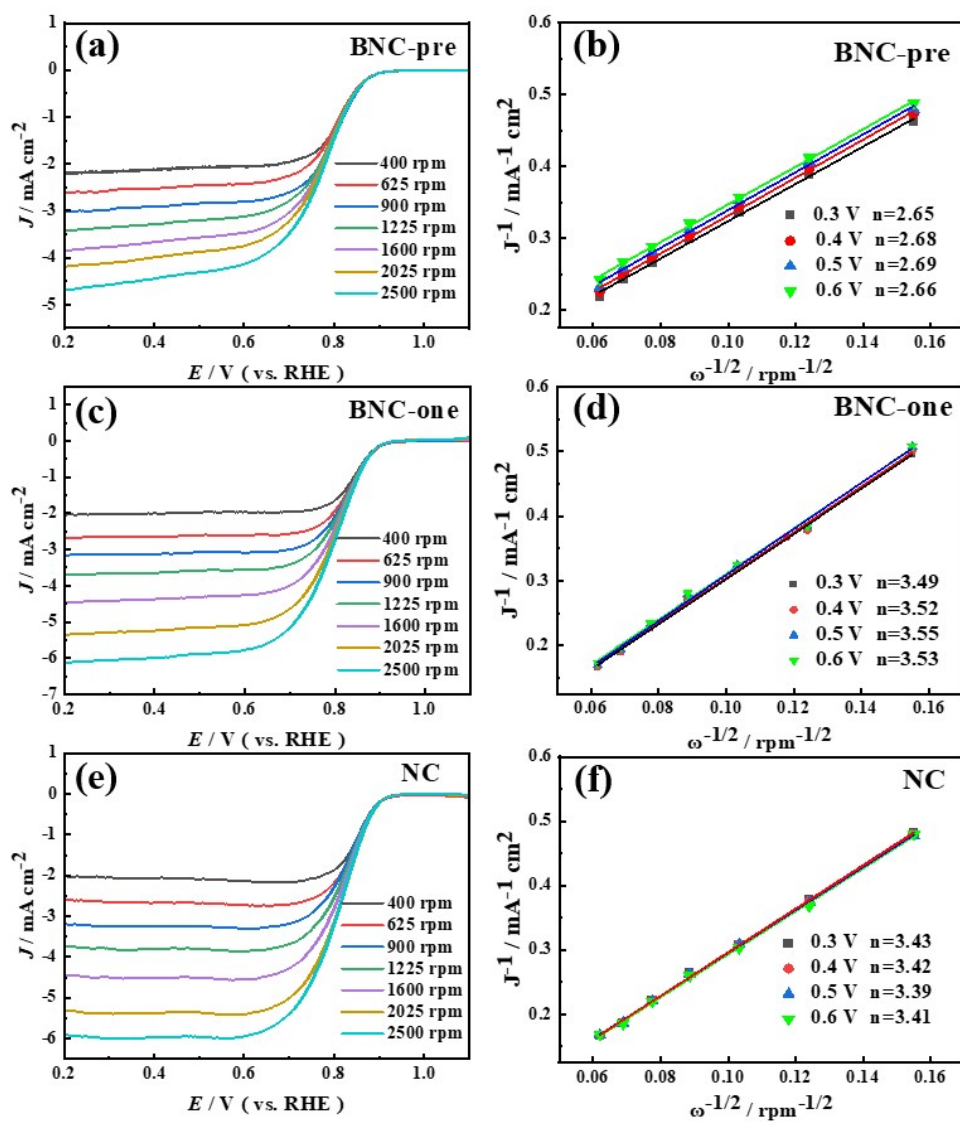

**Figure S9.** (a, c, e) ORR polarization curves of BNC-pre, BNC-one, and NC recorded at different rotation speeds. (b, d, f) Linearly fitted K-L curves at different potential of BNC-pre, BNC-one, and NC.

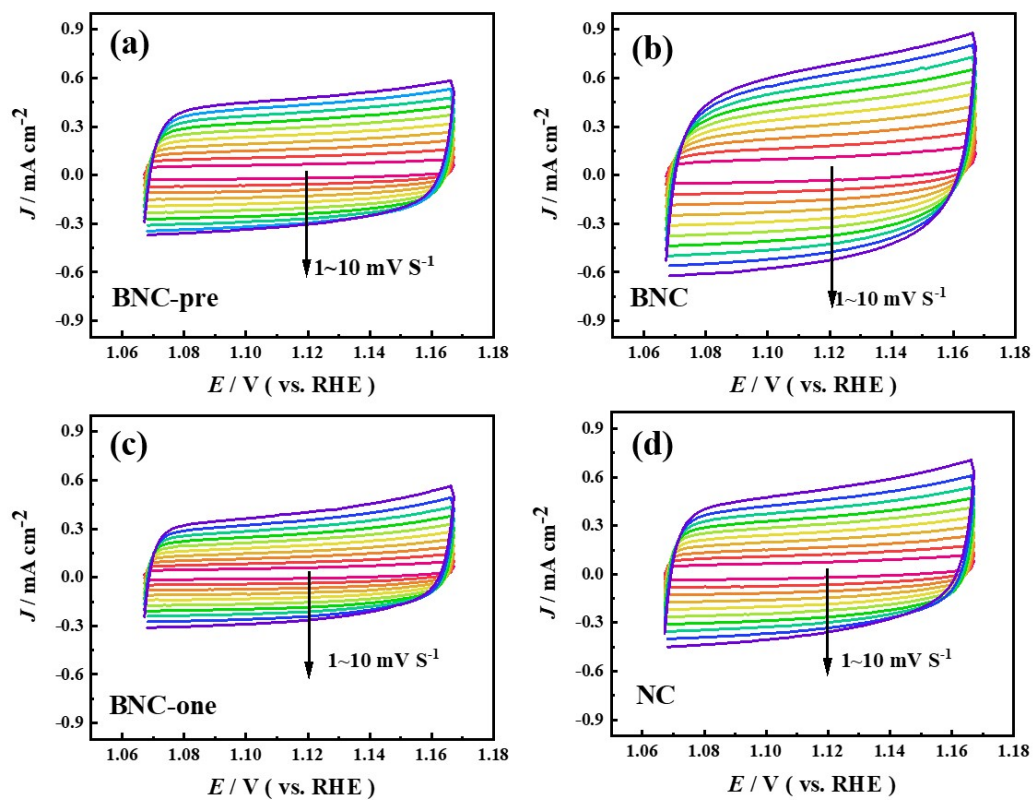

**Figure S10.** The CV curves at various scan rate (1-10  $\text{mV s}^{-1}$ ) of (a) BNC-pre, (b) BNC, (c) BNC-one, and (d) NC.

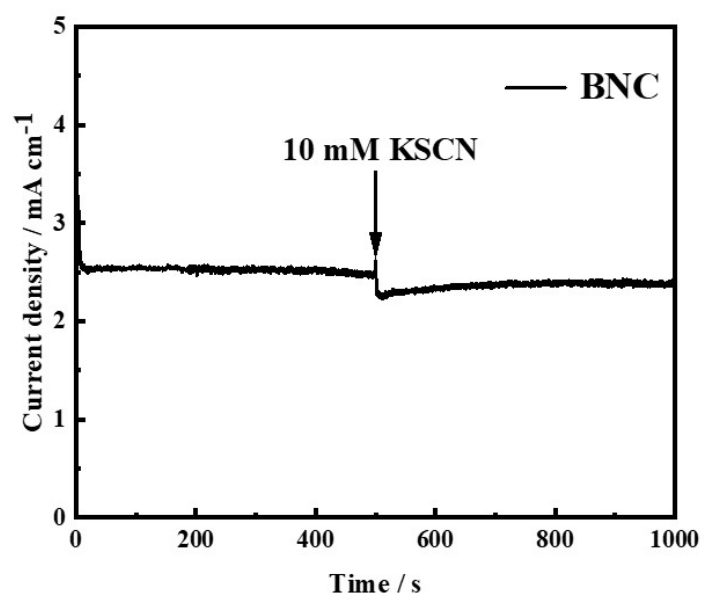

**Figure S11.** Chronoamperometric response of BNC in O<sub>2</sub>-saturated 0.1 M KOH with the addition of KSCN (resulting in an electrolyte with 0.01 M KSCN).

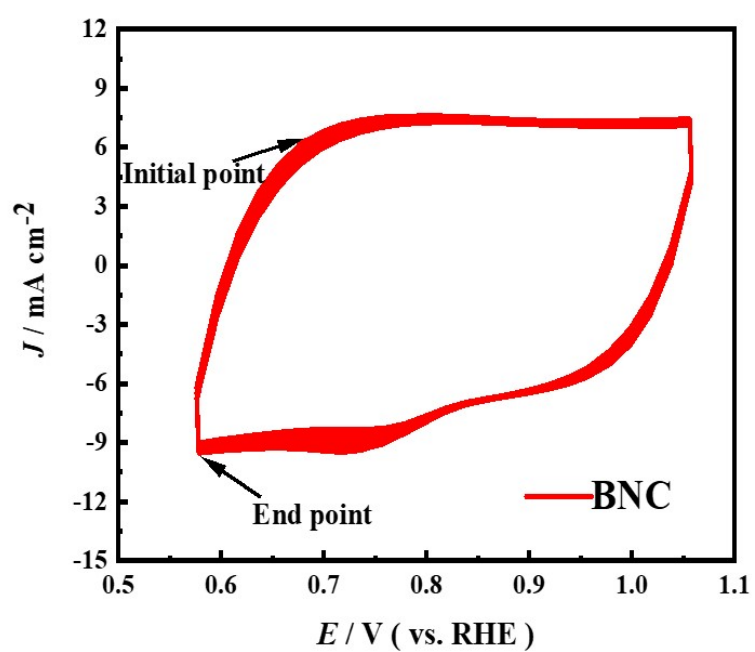

**Figure S12.** ORR cyclic measurements of BNC at a scan rate of  $100 \text{ mV s}^{-1}$  for 10000 cycles.
